# Supplementary material
Source: HighWire-hosted journal article supplement (https://bmjopen.bmj.com/content/15/3/e093525)
Supplement: inline-supplementary-material-5 [file inline-supplementary-material-5.pdf]

## Scoping Review

## List of selected articles with identifying information

| No | Author                               | Title                                                                                                                                                                                                                                            | Year | Country         | Evidence type/<br>source          | Industry/ occupation                                                                                           |
|----|--------------------------------------|--------------------------------------------------------------------------------------------------------------------------------------------------------------------------------------------------------------------------------------------------|------|-----------------|-----------------------------------|----------------------------------------------------------------------------------------------------------------|
| 1  | Greaney                              | Assessing physical and mental fitness to work                                                                                                                                                                                                    | 2017 | USA             | Informative article               | Industry/ work task not specified                                                                              |
| 2  | Allison                              | Does pre-employment medical testing reduce workplace injuries?                                                                                                                                                                                   | 2016 | USA             | Informative article               | Industry/ work task not specified                                                                              |
| 3  | Preisser et al                       | Fitness to work: a comparison of European guidelines in the offshore wind industry                                                                                                                                                               | 2016 | International   | Scholarly publication             | Offshore wind energy platform workers                                                                          |
| 4  | Arco Professional Safety Services    | Medicals for working at height & confined spaces                                                                                                                                                                                                 | 2023 | UK              | Online marketing                  | Work at heights<br>Confined spaces                                                                             |
| 5  | Healthscreen UK                      | Working at height medical – health surveillance                                                                                                                                                                                                  | 2023 | UK              | Online marketing                  | Work at heights                                                                                                |
| 6  | Cooper                               | Working at heights. A psychological perspective                                                                                                                                                                                                  | 1998 | None specified  | Scholarly publication             | Work at heights                                                                                                |
| 7  | Bhende                               | Vertigo testing model for ensuring working at height to prevent fall from height of persons due to acrophobia                                                                                                                                    | 2021 | India           | Professional report/<br>guideline | Work at heights                                                                                                |
| 8  | Safe Build Forum                     | Non-selective medical testing – legalised discrimination – Part 1                                                                                                                                                                                | 2014 | South Africa    | Online community                  | Construction                                                                                                   |
| 9  | AlphaBiolabs                         | Working at height medical assessment                                                                                                                                                                                                             | 2024 | UK              | Online marketing                  | Work at heights                                                                                                |
| 10 | Jobfit                               | Pre-employment medical assessments                                                                                                                                                                                                               | 2024 | Australia       | Online marketing                  | Mining, rail workers, oil/ gas industry, helicopter underwater escape, commercial drivers, hazardous chemicals |
| 11 | Kalkan & Bunch                       | Impact of job-specific new-hire functional testing                                                                                                                                                                                               | 2006 | None specified  | Conference paper                  | Oil/ gas industry                                                                                              |
| 12 | Adisesh et al                        | Occupational health standards in the construction industry                                                                                                                                                                                       | 2007 | UK              | Professional report/<br>guideline | Construction                                                                                                   |
| 13 | Institute for Work at Heights (IFWH) | Legal requirements – working at height contractors                                                                                                                                                                                               | 2021 | South Africa    | Informative article               | Work at heights                                                                                                |
| 14 | Safework Australia                   | Guide for managing the risk of fatigue at work                                                                                                                                                                                                   | 2013 | Australia       | Professional report/<br>guideline | Industry/ work task not specified                                                                              |
| 15 | Phillips et al                       | Marijuana in the workplace: Guidance for occupational health professionals and employers: joint guidance statement of the American Association of Occupational Health Nurses and the American College of Occupational and Environmental Medicine | 2015 | USA             | Professional report/<br>guideline | Industry/ work task not specified                                                                              |
| 16 | Howard et al                         | Cannabis and work: implications, impairment, and the need for further research                                                                                                                                                                   | 2020 | USA             | Online community                  | Industry/ work task not specified                                                                              |
| 17 | CCOHS                                | Impairment at work – Policy and recognition                                                                                                                                                                                                      | 2022 | Canada          | Online community                  | Industry/ work task not specified                                                                              |
| 18 | Schaafsma et al                      | Pre-employment examinations for preventing injury, disease and sick leave in workers                                                                                                                                                             | 2016 | International   | Scholarly publication             | Industry/ work task not specified                                                                              |
| 19 | Biasutti et al                       | Systematic review of cannabis use and risk of occupational injury                                                                                                                                                                                | 2020 | International   | Scholarly publication             | Industry/ work task not specified                                                                              |
| 20 | Madan et al                          | The management of musculoskeletal disorders in the workplace                                                                                                                                                                                     | 2015 | UK              | Scholarly publication             | Industry/ work task not specified                                                                              |
| 21 | Gurubhagavatula et al                | OSA in professional transport operations: safety, regulatory, and economic impact                                                                                                                                                                | 2020 | International   | Scholarly publication             | Commercial drivers                                                                                             |
| 22 | Gouttebauge et al                    | Developing a best-evidence pre-employment medical examination: an example from the construction industry                                                                                                                                         | 2014 | The Netherlands | Scholarly publication             | Construction                                                                                                   |
| 23 | Dawson et al                         | Safety implications of fatigue and sleep inertia for emergency services personnel                                                                                                                                                                | 2021 | International   | Scholarly publication             | Emergency services                                                                                             |
|    | Sluiter & Frings-Dresen              | What do we know about aging at work? Evidence-based fitness for duty and health in                                                                                                                                                               | 2007 | International   | Scholarly publications            | firefighters                                                                                                   |

## Scoping Review

## List of selected articles with identifying information

|    |                    |                                                                                                                                       |      |                 |                        |                                       |
|----|--------------------|---------------------------------------------------------------------------------------------------------------------------------------|------|-----------------|------------------------|---------------------------------------|
| 24 |                    | fire-fighters                                                                                                                         |      |                 |                        |                                       |
| 25 | Heydari et al      | Building resilience in firefighters: a systematic review                                                                              | 2022 | International   | Scholarly publications | firefighters                          |
| 26 | Baertsch et al     | Towards the validation of an observational tool to detect impaired drivers – an online video study                                    | 2022 | None specified  | Scholarly publications | drivers                               |
| 27 | Walsworth          | Prohibiting use of recreational cannabis by safety-sensitive workers in Canada: a legal evaluation of the new workplace policies      | 2022 | Canada          | Scholarly publication  | Industry/ work task not specified     |
| 28 | Grout & Leggat     | Cabin crew health and fitness-to-fly: opportunities for re-evaluation amid Covid-19                                                   | 2021 | International   | Scholarly publication  | Airline staff                         |
| 29 | Preisser et al (2) | The physical performance of workers on offshore wind energy platforms: is pre-employment fitness testing necessary and fair?          | 2019 | International   | Scholarly publication  | Offshore wind energy platform workers |
| 30 | Stringham et al    | Medical marijuana in the work place: keeping small business informed                                                                  | 2017 | USA             | Informative article    | Industry/ work task not specified     |
| 31 | Barth et al        | Inter-rater agreement in evaluation of disability: systematic review of reproducibility studies                                       | 2017 | International   | Scholarly publication  | Industry/ work task not specified     |
| 32 | Lechner            | The value of physical abilities testing                                                                                               | 2016 | USA             | Informative article    | Industry/ work task not specified     |
| 33 | Boschman et al     | Improving fit-to-work assessments for rail safety workers by exploring work limitations                                               | 2016 | The Netherlands | Scholarly publication  | Rail workers                          |
| 34 | Rothstein et al    | Limiting occupational medical evaluations under the Americans with Disabilities Act and the Genetic Information Nondiscrimination Act | 2015 | USA             | Scholarly publication  | Industry/ work task not specified     |
| 35 | Busick             | What regulations cover workplace drug testing?                                                                                        | 2015 | USA             | Informative article    | Industry/ work task not specified     |
| 36 | Tipton et al       | Physiological employment standards – I. Occupational fitness standards: objectively subjective?                                       | 2013 | International   | Scholarly publication  | Industry/ work task not specified     |
| 37 | Wamuziri           | Evaluation of workplace drug testing in UK civil engineering construction                                                             | 2011 | UK              | Scholarly publication  | Construction                          |
| 38 | Tufts et al        | Auditory fitness for duty: A review                                                                                                   | 2009 | International   | Scholarly publication  | Industry/ work task not specified     |
| 39 | Stastny            | Not to catch but to deter ( <i>substance testing</i> )                                                                                | 2009 | International   | Online marketing       | Industry/ work task not specified     |
| 40 | Serra et al        | Systematic review of criteria and methods used for the assessment of fitness to work                                                  | 2006 | International   | Scholarly publication  | Industry/ work task not specified     |
| 41 | Seijts & O'Farrell | Urine collection jars versus video games: perceptions of three stakeholder groups towards drug and impairment testing programs        | 2005 | USA             | Scholarly publication  | Industry/ work task not specified     |
| 42 | Anonymous          | Constructing better health                                                                                                            | 2007 | UK              | Informative article    | Construction                          |
| 43 | Pransky & Dempsey  | Practical aspects of functional capacity evaluations                                                                                  | 2004 | USA             | Scholarly publication  | Industry/ work task not specified     |
| 44 | Glozier            | Mental ill health and fitness for work                                                                                                | 2002 | International   | Informative article    | Industry/ work task not specified     |
| 45 | Messing et al      | Equality and difference in the workplace: physical job demands, occupational illnesses, and sex differences                           | 2000 | International   | Scholarly publication  | Industry/ work task not specified     |
| 46 | Vetter             | Is a personality test a pre-job offer medical examination under the ADA?                                                              | 1999 | USA             | Scholarly publication  | Industry/ work task not specified     |
| 47 | Davies             | ABC of work related disorders: Assessing fitness for work                                                                             | 1996 | UK              | Scholarly publication  | Industry/ work task not specified     |
| 48 | Lapere             | Occupational medical examinations and labour law                                                                                      | 2003 | South Africa    | Thesis                 | Industry/ work task not specified     |

## Scoping Review

## List of selected articles with identifying information

|    |                                                                |                                                                                                                                                                                          |      |               |                                |                                                               |
|----|----------------------------------------------------------------|------------------------------------------------------------------------------------------------------------------------------------------------------------------------------------------|------|---------------|--------------------------------|---------------------------------------------------------------|
| 49 | Sluiter                                                        | High demand jobs: age-related diversity in work ability?                                                                                                                                 | 2006 | International | Scholarly publication          | Industry/ work task not specified                             |
| 50 | Williams & Schouten                                            | Assessment of occupational impairment and disability from depression                                                                                                                     | 2008 | International | Scholarly publication          | Industry/ work task not specified                             |
| 51 | Chan et al                                                     | Aging and fitness to work                                                                                                                                                                | 2000 | International | Scholarly publication          | Industry/ work task not specified                             |
| 52 | Sherry                                                         | Managing fatigue in the railroad industry                                                                                                                                                | 2007 | International | Professional report/ guideline | Rail workers                                                  |
| 53 | Homeland & Stannard                                            | Decision aid for the use of additional tests during the pre-employment medical examination (PEME) of seafarers                                                                           | 2017 | International | Scholarly publication          | Seafarers                                                     |
| 54 | Pachman                                                        | Evidence base for pre-employment medical screening                                                                                                                                       | 2009 | International | Scholarly publication          | Industry/ work task not specified                             |
| 55 | Guthrie & Westaway                                             | Emerging legal concerns with chronic diseases in the Australian workplace: Pre-employment medicals, functional capacity evaluations, workers' compensation and disability discrimination | 2009 | Australia     | Scholarly publication          | Industry/ work task not specified                             |
| 56 | Barbey                                                         | Health assessment of fitness to work in the E&P industry: an E&P forum initiative                                                                                                        | 1996 | International | Conference paper               | E&P industry (exploration & production in oil & gas industry) |
| 57 | Orr                                                            | Keeping Alaskans safe is ultimate goal                                                                                                                                                   | 2014 | USA - Alaska  | Informative article            | Industry/ work task not specified                             |
| 58 | Bray et al                                                     | Behavioral and occupational fitness                                                                                                                                                      | 2010 | USA           | Scholarly publication          | Military                                                      |
| 59 | Raj & Muthukumar                                               | Pre-medical assessment for ensuring work at height fitness                                                                                                                               | 2023 | India         | Professional report/ guideline | Work at heights                                               |
| 60 | GlobeNewswire                                                  | Australian Civil Construction Entity, State Road Constructions, selects intelligent fingerprinting drug screening system as workplace drug screening solution                            | 2023 | Australia     | Press release                  | Construction                                                  |
| 61 | Federal Aviation Administration                                | Procedures for transportation workplace drug and alcohol testing programs: addition of oral fluid specimen testing for drugs                                                             | 2023 | USA           | Professional report/ guideline | Transport including aviation, rail, road                      |
| 62 | Huerte et al                                                   | Health risk classification patterns among Filipino seafarers. Analysis from a pre-employment clinic in the Philippines: a 5-year review                                                  | 2023 | Philippines   | Scholarly publication          | Seafarers                                                     |
| 63 | Industrial Rope Access Trade Association (IRATA) International | Work and safety analysis 2023                                                                                                                                                            | 2023 | International | Professional report/ guideline | Work at heights                                               |
| 64 | Department of Mineral Resources (South Africa)                 | Guideline for a mandatory code of practice on the minimum standards of fitness to perform work on a mine                                                                                 | 2016 | South Africa  | Professional report/ guideline | Mining                                                        |
| 65 | Madan & Williams                                               | Is pre-employment health screening by questionnaire effective?                                                                                                                           | 2012 | UK            | Scholarly publication          | Industry/ work task not specified                             |
| 66 | Light Rail Safety & Standards Board (LRSSB)                    | Guidance on the management of drugs and alcohol                                                                                                                                          | 2023 | UK            | Professional report/ guideline | Light rail tram operators                                     |
| 67 | Heng et al                                                     | Individual evaluation of fatigue at work to enhance the safety performance in the construction industry: a systematic review                                                             | 2024 | Malaysia      | Scholarly publication          | Construction                                                  |
| 68 | Lurati                                                         | Identifying personal risk factors for falls in the workplace                                                                                                                             | 2017 | USA           | Informative article            | Industry/ work task not specified                             |
